# Supplementary material for: Microscopic mechanisms of vertical graphene and carbon nanotube cap nucleation from hydrocarbon growth precursors
Source: Royal Society of Chemistry journal article supplement (doi:10.1039/c4nr00669k), 2014-01-01
Supplement: c4nr00669k1.pdf [file c4nr00669k1.pdf]

## Supporting information

**Table 1** – Main observed pyrolysis mechanisms for  $C_2H_2$  and  $C_6H_6$  and their relative occurrence. All observed processes are also described in literature, as indicated by the references

|                    | pyrolysis mechanisms                                                                    | Rel. occurrence (%) | Literature   |
|--------------------|-----------------------------------------------------------------------------------------|---------------------|--------------|
| $C_2H_2$ pyrolysis | $C_2H_2 \rightarrow C_2H + H$                                                           | 50                  | [51, 52]     |
|                    | $C_2H_2 \rightarrow 2CH$                                                                | 17                  | [52]         |
|                    | $C_2H_2 + H \rightarrow C_2H_3 \rightarrow C_2H + 2H$                                   | 16                  | [51, 52, 58] |
|                    | $C_2H_2 \rightarrow C_2 + 2H$                                                           | 6                   | [52]         |
|                    | other reactions, see Table 2                                                            | 11                  | [51-53, 55]  |
| $C_6H_6$ pyrolysis | $C_6H_6 \rightarrow C_6H_5 + H \rightarrow C_6H_4 + 2H \rightarrow C_4H_3 + C_2H_2 + H$ | 33                  | [54]         |
|                    | $C_6H_6 \rightarrow 3C_2H_2$                                                            | 13                  | [57]         |
|                    | $C_6H_6 + H \rightarrow C_6H_7 \rightarrow C_6H_5 + 2H$                                 | 12                  | [54]         |
|                    | $C_6H_6 \rightarrow 2C_3H_3$                                                            | 7                   | [56]         |
|                    | other reactions, see Table 2                                                            | 35                  | [54-57]      |

**Table 2** – Additional pyrolysis mechanisms observed for  $C_2H_2$  and  $C_6H_6$ , besides the ones listed in Table 1, with lower frequency of occurrence. The superscript *des* indicates a desorbed molecule.

|                    | Reactions                                                                                                                                                                                                                                                                                                                                                                                                                                                                                                                                                                                                           |
|--------------------|---------------------------------------------------------------------------------------------------------------------------------------------------------------------------------------------------------------------------------------------------------------------------------------------------------------------------------------------------------------------------------------------------------------------------------------------------------------------------------------------------------------------------------------------------------------------------------------------------------------------|
| $C_2H_2$ pyrolysis | $C_2H_2 + H_2 \rightarrow C_2H_4$<br>$C_2H_2 + CH_2 \rightarrow C_3H_4$ (not propyne)<br>$C_2H_2 + C_2H \rightarrow C_2 + C_2H_3$<br>$C_2H + H \rightarrow C_2H_2$<br>$C_2H \rightarrow CH + H$<br>$C_2H \rightarrow CH_2 + H$<br>$CH + H \rightarrow CH_2$<br>$CH + 2H \rightarrow CH_3$ or $CH_2 + H \rightarrow CH_3$<br>$CH + 3H \rightarrow CH_4$ or $CH_3 + H \rightarrow CH_4$<br>$CH_3 \rightarrow CH_2 + H$<br>$CH \rightarrow C + H$<br>$C_4H_5^{des} + C_2H \rightarrow C_6H_6$ (not benzene)                                                                                                            |
| $C_6H_6$ pyrolysis | $C_6H_5 + H \rightarrow C_6H_6$<br>$C_6H_6 \rightarrow C_5H_3 + CH_2 + H \rightarrow C_3H + CH_2 + C_2 + 3H$<br>$C_6H_7 \rightarrow C_6H_6 + H$<br>$C_6H_7 \rightarrow C_6H_5 + H_2$<br>$C_4H_4 \rightarrow 2C_2H_2$<br>$C_2H_2 + C_2H_2 \rightarrow C_4H_4 \rightarrow C_4H_3 + H \rightarrow C_4H_2 + 2H \rightarrow C_4H + 3H \rightarrow C_4 + 4H$<br>$C_6H_6 \rightarrow C_5H_4 + CH + H \rightarrow C_5H_3 + CH + 2H \rightarrow C_3H_2 + C_2H + CH + 2H \rightarrow C_2 + CH_2 + C_2H$<br><br><p>Note that all aforementioned reactions for <math>C_2H_2</math> pyrolysis may occur in this case as well</p> |
